# Supplementary material
Source: Elsevier journal article supplement (https://www.sciencedirect.com/science/article/pii/S2173574317300540)
Supplement: mmc1 [file S2173574317300540:mmc1.docx]

**ESTRATEGIAS BÚSQUEDAS BIBLIOGRÁFICAS DE LAS REVISIONES SISTEMÁTICAS**

**Revisión sistemática 1. Contraindicación para la utilización de Metotrexato**

Filters:  English; French; Spanish

**Pubmed**

("Arthritis, Rheumatoid"[Mesh] OR "Caplan Syndrome"[Mesh] OR "Rheumatoid Nodule"[Mesh] OR "Felty Syndrome"[Mesh] OR "Rheumatoid Arthritis"[Title/Abstract] OR “early arthritis”[Title/Abstract] OR "inflammatory arthritis"[Title/Abstract] OR "Arthritis rheumatoid"[All Fields] OR ("arthritis"[All Fields] AND "rheumatoid"[All Fields]) OR ("rheumatoid"[All Fields] AND "arthritis"[All Fields])) AND ("methotrexate"[MeSH Terms] OR "methotrexate"[All Fields] OR "metotrexato"[All Fields] OR "MTX"[Title/Abstract]) AND ("contraindications"[Subheading] OR contraindicat*[Title/Abstract] OR “counterindication*”[Title/Abstract] OR “contra indication*” [Title/Abstract] ) NOT ("Clinical Conference"[Publication Type] OR "Congresses"[Publication Type] OR "Consensus Development Conference"[Publication Type] OR "Editorial"[Publication Type] OR "Published Erratum"[Publication Type] OR "Letter"[Publication Type] OR "Comment"[Publication Type]) NOT ("Animals"[Mesh] NOT ("Animals"[Mesh] AND "Humans"[Mesh]))

**Embase**

'arthritis, rheumatoid'/exp OR 'caplan syndrome'/exp OR 'caplan syndrome':ab,ti OR 'rheumatoid nodule'/exp OR 'rheumatoid nodule':ab,ti OR 'felty syndrome'/exp OR 'felty syndrome':ab,ti OR 'rheumatoid arthritis'/exp OR 'rheumatoid arthritis':ab,ti OR 'early arthritis':ab,ti OR 'inflammatory arthritis'/exp OR 'inflammatory arthritis':ab,ti OR 'arthritis rheumatoid'/exp OR 'arthritis rheumatoid':ab,ti OR ('arthritis'/exp OR 'arthritis':ab,ti AND 'rheumatoid':ab,ti) OR ('rheumatoid':ab,ti AND ('arthritis'/exp OR 'arthritis':ab,ti)) AND ('methotrexate'/exp OR methotrexate:ab,ti OR metotrexato:ab,ti OR 'mtx'/exp OR mtx:ab,ti) AND ('drug contraindication'/exp OR 'drug contraindication':ab,ti OR contraindicat*:ab,ti OR counterindication*:ab,ti OR “contra indication”:ab,ti ) AND [embase]/lim NOT [medline]/lim AND ([english]/lim OR [french]/lim OR [spanish]/lim) NOT ('animals'/exp NOT ('animals'/exp AND 'humans'/exp)) NOT ([conference abstract]/lim OR [conference paper]/lim OR [conference review]/lim OR [erratum]/lim OR [letter]/lim OR [note]/lim OR [short survey]/lim)

**Cochrane**

ID Search Hits

#1 MeSH descriptor: [Arthritis, Rheumatoid] explode all trees 4191

#2 "rheumatoid arthritis":ti,ab 6588

#3 "arthritis rheumatoid":ti,ab 17

#4 "early arthritis":ti,ab 31

#5 #1 or #2 or #3 or #4 7244

#6 MeSH descriptor: [Methotrexate] this term only 2856

#7 (methotrexat* or mtx):ab,ti 4952

#8 #6 or #7 5571

#9 #5 and #8 1611

#10 (contraindicat* or counterindication* or "contra indication*"):ab,ti 2345

#11 #9 and #10 11

**Revision sistemática 2. Toxicidad al Metotrexato**

Filters:  English; French; Spanish

**Pubmed**

("Arthritis, Rheumatoid"[Mesh] OR "Caplan Syndrome"[Mesh] OR "Rheumatoid Nodule"[Mesh] OR "Felty Syndrome"[Mesh] OR "Rheumatoid Arthritis"[Title/Abstract] OR “early arthritis”[Title/Abstract] OR "inflammatory arthritis"[Title/Abstract] OR "Arthritis rheumatoid"[All Fields] OR ("arthritis"[All Fields] AND "rheumatoid"[All Fields]) OR ("rheumatoid"[All Fields] AND "arthritis"[All Fields]))AND ("methotrexate"[MeSH Terms] OR "methotrexate"[All Fields] OR "metotrexato"[All Fields] OR "MTX"[Title/Abstract]) AND ("toxicity"[Subheading] OR “Toxic*”[Title/Abstract] OR “toxologic*”[Title/Abstract] OR “Drug Toxicity”[Title/Abstract] OR "Drug-Related Side Effects and Adverse Reactions"[Mesh] OR “Adverse Drug Reaction Reporting Systems"[Mesh] OR intoleran*[Title/Abstract] OR “intoxication”[Title/Abstract] OR “adverse event*”[Title/Abstract]) NOT ("Clinical Conference"[Publication Type] OR "Congresses"[Publication Type] OR "Consensus Development Conference"[Publication Type] OR "Editorial"[Publication Type] OR "Published Erratum"[Publication Type] OR "Letter"[Publication Type] OR "Comment"[Publication Type]) NOT ("Animals"[Mesh] NOT ("Animals"[Mesh] AND "Humans"[Mesh]))

**Embase**

'arthritis, rheumatoid'/de OR 'caplan syndrome'/de OR 'caplan syndrome':ab,ti OR 'rheumatoid nodule'/de OR 'rheumatoid nodule':ab,ti OR 'felty syndrome'/de OR 'felty syndrome':ab,ti OR 'rheumatoid arthritis'/de OR 'rheumatoid arthritis':ab,ti OR 'early arthritis':ab,ti OR 'inflammatory arthritis'/de OR 'inflammatory arthritis':ab,ti OR 'arthritis rheumatoid'/de OR 'arthritis rheumatoid':ab,ti OR ('arthritis'/exp OR 'arthritis':ab,ti AND 'rheumatoid':ab,ti) OR ('rheumatoid':ab,ti AND ('arthritis'/exp OR 'arthritis':ab,ti)) AND ('methotrexate'/exp OR methotrexate:ab,ti OR metotrexato:ab,ti OR 'mtx'/exp OR mtx:ab,ti) AND ('toxicity'/de OR toxic*:ab,ti OR 'drug toxicity'/de OR 'drug toxicity and intoxication'/de OR 'drug toxicity':ab,ti OR 'adverse drug reaction'/de OR 'adverse drug reaction':ab,ti OR intoleran*:ab,ti OR 'intoxication'/de OR 'adverse event':ab,ti) AND [embase]/lim NOT [medline]/lim AND ([english]/lim OR [french]/lim OR [spanish]/lim) NOT ('animals'/exp NOT ('animals'/exp AND 'humans'/exp)) NOT ([conference abstract]/lim OR [conference paper]/lim OR [conference review]/lim OR [erratum]/lim OR [letter]/lim OR [note]/lim OR [short survey]/lim)

**Cochrane**

ID Search Hits

#1 MeSH descriptor: [Arthritis, Rheumatoid] this term only 4049

#2 "rheumatoid arthritis":ti,ab 6589

#3 "arthritis rheumatoid":ti,ab 17

#4 #1 or #2 or #3 7094

#5 MeSH descriptor: [Methotrexate] explode all trees 2856

#6 (methotrexat* or mtx):ab,ti 4953

#7 #5 or #6 5572

#8 #4 and #7 1605

#9 ((toxic* or toxicologic* or "drug toxicity") near (MTX or methotrexat*)):ti,ab 197

#10 MeSH descriptor: [Drug-Related Side Effects and Adverse Reactions] explode all trees 2471

#11 ((intoleran* or intoxication or "adverse event*") near (MTX or methotrexat*)):ti,ab 69

#12 #9 or #10 or #11 2722

#13 #8 and #12 117

**Revision sistemática 3. Falta de adherencia al Metotrexato.**

Filters:  English; French; Spanish

**Pubmed**

("Arthritis, Rheumatoid"[Mesh] OR "Caplan Syndrome"[Mesh] OR "Rheumatoid Nodule"[Mesh] OR "Felty Syndrome"[Mesh] OR "Rheumatoid Arthritis"[Title/Abstract] OR “early arthritis”[Title/Abstract] OR "inflammatory arthritis"[Title/Abstract] OR "Arthritis rheumatoid"[All Fields] OR ("arthritis"[All Fields] AND "rheumatoid"[All Fields]) OR ("rheumatoid"[All Fields] AND "arthritis"[All Fields])) AND ("methotrexate"[MeSH Terms] OR "methotrexate"[All Fields] OR "metotrexato"[All Fields] OR "MTX"[Title/Abstract]) AND ("Medication Adherence"[MeSH Terms] OR "Patient Compliance"[Mesh] OR "Patient Dropouts"[Mesh] OR “Treatment Refusal"[Mesh] OR Nonadheren*[Title/Abstract] OR non-adheren*[Title/Abstract] OR “noncompliance”[Title/Abstract] OR “non-compliance”[Title/Abstract] OR "adherence"[Title/Abstract] OR "compliance"[Title/Abstract] OR “Drug discontinuation”[Title/Abstract]) NOT ("Clinical Conference"[Publication Type] OR "Congresses"[Publication Type] OR "Consensus Development Conference"[Publication Type] OR "Editorial"[Publication Type] OR "Published Erratum"[Publication Type] OR "Letter"[Publication Type] OR "Comment"[Publication Type]) NOT ("Animals"[Mesh] NOT ("Animals"[Mesh] AND "Humans"[Mesh]))

**Embase**

'arthritis, rheumatoid'/exp OR 'caplan syndrome'/exp OR 'caplan syndrome':ab,ti OR 'rheumatoid nodule'/exp OR 'rheumatoid nodule':ab,ti OR 'felty syndrome'/exp OR 'felty syndrome':ab,ti OR 'rheumatoid arthritis'/exp OR 'rheumatoid arthritis':ab,ti OR 'early arthritis':ab,ti OR 'inflammatory arthritis'/exp OR 'inflammatory arthritis':ab,ti OR 'arthritis rheumatoid'/exp OR 'arthritis rheumatoid':ab,ti OR ('arthritis'/exp OR 'arthritis':ab,ti AND 'rheumatoid':ab,ti) OR ('rheumatoid':ab,ti AND ('arthritis'/exp OR 'arthritis':ab,ti)) AND ('methotrexate'/exp OR methotrexate:ab,ti OR metotrexato:ab,ti OR 'mtx'/exp OR mtx:ab,ti) AND ('drug contraindication'/exp OR 'drug contraindication':ab,ti OR contraindicat*:ab,ti OR counterindication*:ab,ti) AND [embase]/lim NOT [medline]/lim AND ([english]/lim OR [french]/lim OR [spanish]/lim) NOT ('animals'/exp NOT ('animals'/exp AND 'humans'/exp))

**Cochrane**

ID Search Hits

#1 MeSH descriptor: [Arthritis, Rheumatoid] this term only 4049

#2 "rheumatoid arthritis":ti,ab 6589

#3 "arthritis rheumatoid":ti,ab 17

#4 #1 or #2 or #3 7094

#5 MeSH descriptor: [Methotrexate] explode all trees 2856

#6 (methotrexat* or mtx):ab,ti 4953

#7 #5 or #6 5572

#8 #4 and #7 1605

#9 (Nonadheren* or non-adheren* or "noncompliance" or "non-compliance" or "adherence" or "compliance" or "Drug discontinuation"):ab,ti 21394

#10 MeSH descriptor: [Medication Adherence] this term only 1092

#11 MeSH descriptor: [Patient Compliance] explode all trees 8959

#12 MeSH descriptor: [Patient Dropouts] this term only 1578

#13 MeSH descriptor: [Treatment Refusal] explode all trees 261

#14 #9 or #10 or #11 or #12 or #13 27305

#15 #8 and #14 31

**Revisión sistemática 4. Estrategias terapéuticas con fármacos modificadores de la enfermedad clásicos en pacientes que no pueden utilizar Metotrexato.**

Filters:  English; French; Spanish

**Pubmed**

(("Arthritis, Rheumatoid"[Mesh] OR "Caplan Syndrome"[Mesh] OR "Rheumatoid Nodule"[Mesh] OR "Felty Syndrome"[Mesh] OR "Rheumatoid Arthritis"[Title/Abstract] OR “early arthritis”[Title/Abstract] OR "inflammatory arthritis"[Title/Abstract] OR "Arthritis rheumatoid"[All Fields] OR ("arthritis"[All Fields] AND "rheumatoid"[All Fields]) OR ("rheumatoid"[All Fields] AND "arthritis"[All Fields])) AND ("methotrexate"[MeSH Terms] OR "methotrexate"[All Fields] OR "metotrexato"[All Fields] OR "MTX"[Title/Abstract]) AND ("Sulfasalazine"[Mesh] OR sulfasalazine[All Fields] OR salazopyrin[All Fields] OR "leflunomide"[Supplementary Concept] OR leflunomide[All Fields] OR "Chloroquine"[Mesh] OR chloroquine[All Fields] OR "Hydroxychloroquine"[Mesh] OR "Organogold Compounds"[Mesh] OR “gold”[All Fields] OR "intramuscular gold"[All Fields] OR "Auranofin"[Mesh] OR auranofin[All Fields] OR "Azathioprine"[Mesh] OR azathioprine[All Fields] OR "Cyclosporine"[Mesh] OR ciclosporin[All Fields] OR "Cyclophosphamide"[Mesh] OR ciclofosfamida[All Fields]) AND ("contraindications"[Subheading] OR contraindicat*[Title/Abstract] OR “counterindication*”[Title/Abstract] OR “contra indication*”[Title/Abstract]  OR "Medication Adherence"[MeSH Terms] OR "Patient Compliance"[Mesh] OR "Patient Dropouts"[Mesh] OR “Treatment Refusal"[Mesh] OR Nonadheren*[Title/Abstract] OR non-adheren*[Title/Abstract] OR “noncompliance”[Title/Abstract] OR “non-compliance”[Title/Abstract] OR "adherence"[Title/Abstract] OR "compliance"[Title/Abstract] OR “Drug discontinuation”[Title/Abstract] OR "toxicity"[Subheading] OR “Toxic*”[Title/Abstract] OR “toxologic*”[Title/Abstract] OR “Drug Toxicity”[Title/Abstract] OR "Drug-Related Side Effects and Adverse Reactions"[Mesh] OR “Adverse Drug Reaction Reporting Systems"[Mesh] OR intoleran*[Title/Abstract] OR “intoxication”[Title/Abstract] OR “adverse event*”[Title/Abstract]) NOT ("Clinical Conference"[Publication Type] OR "Congresses"[Publication Type] OR "Consensus Development Conference"[Publication Type] OR "Editorial"[Publication Type] OR "Published Erratum"[Publication Type] OR "Letter"[Publication Type] OR "Comment"[Publication Type]) NOT ("Animals"[Mesh] NOT ("Animals"[Mesh] AND "Humans"[Mesh])))

**Embase**

'arthritis, rheumatoid'/de OR 'caplan syndrome'/de OR 'caplan syndrome':ab,ti OR 'rheumatoid nodule'/de OR 'rheumatoid nodule':ab,ti OR 'felty syndrome'/de OR 'felty syndrome':ab,ti OR 'rheumatoid arthritis'/de OR 'rheumatoid arthritis':ab,ti OR 'early arthritis':ab,ti OR 'inflammatory arthritis'/de OR 'inflammatory arthritis':ab,ti OR 'arthritis rheumatoid'/de OR 'arthritis rheumatoid':ab,ti OR ('arthritis'/exp OR 'arthritis':ab,ti AND 'rheumatoid':ab,ti) OR ('rheumatoid':ab,ti AND ('arthritis'/exp OR 'arthritis':ab,ti)) AND 'methotrexate'/exp OR methotrexate:ab,ti OR metotrexato:ab,ti OR 'mtx'/exp OR mtx:ab,ti AND ('sulfasalazine'/exp OR sulfasalazine:ab,ti OR 'salazopyrin'/exp OR salazopyrin:ab,ti OR 'leflunomide':ab,ti OR 'leflunomide'/exp OR 'chloroquine':ab,ti OR 'chloroquine'/exp OR 'hydroxychloroquine'/exp OR 'hydroxychloroquine':ab,ti OR 'organogold compounds'/exp OR 'organogold compounds':ab,ti OR 'organogold':ab,ti OR 'intramuscular gold':ab,ti OR 'auranofin':ab,ti OR 'auranofin'/exp OR 'azathioprine':ab,ti OR 'azathioprine'/exp OR 'cyclosporine'/exp OR 'cyclosporine':ab,ti OR 'ciclosporin'/exp OR ciclosporin*:ab,ti OR 'cyclophosphamide'/exp OR 'cyclophosphamide':ab,ti OR 'ciclofosfamida'/exp OR ciclofosfamida:ab,ti) AND ('drug contraindication'/exp OR 'drug contraindication':ab,ti OR contraindicat*:ab,ti OR counterindication*:ab,ti OR “contra indication”:ab,ti  OR 'medication compliance'/de OR 'medication adherence':ab,ti OR 'patient compliance'/exp OR 'patient compliance':ab,ti OR 'patient dropouts'/exp OR 'patient dropouts':ab,ti OR 'treatment refusal'/de OR 'treatment refusal':ab,ti OR nonadheren*:ab,ti OR 'non adherence':ab,ti OR noncompliance:ab,ti OR 'non compliance':ab,ti OR adherence:ab,ti OR compliance:ab,ti OR 'drug discontinuation':ab,ti OR 'toxicity'/de OR toxic*:ab,ti OR 'drug toxicity'/de OR 'drug toxicity and intoxication'/de OR 'drug toxicity':ab,ti OR 'adverse drug reaction'/de OR 'adverse drug reaction':ab,ti OR intoleran*:ab,ti OR 'intoxication'/de OR 'adverse event':ab,ti ) AND ( [embase]/lim NOT [medline]/lim AND ([english]/lim OR [french]/lim OR [spanish]/lim) NOT ('animals'/exp NOT ('animals'/exp AND 'humans'/exp)) NOT ([conference abstract]/lim OR [conference paper]/lim OR [conference review]/lim OR [erratum]/lim OR [letter]/lim OR [note]/lim OR [short survey]/lim)

**Cochrane**

ID Search Hits

#1 MeSH descriptor: [Arthritis, Rheumatoid] this term only 4051

#2 "rheumatoid arthritis":ti,ab 6606

#3 "arthritis rheumatoid":ti,ab 17

#4 #1 or #2 or #3 7111

#5 MeSH descriptor: [Methotrexate] explode all trees 2859

#6 (methotrexat* or mtx):ab,ti 4974

#7 #5 or #6 5593

#8 #4 and #7 1613

#9 (sulfasalazine or salazopyrin or "leflunomide" or chloroquine or "Hydroxychloroquine" or "Organogold Compounds" or "gold" or "intramuscular gold" or auranofin or azathioprine or ciclosporin or ciclofosfamida):ti,ab 6375

#10 #8 and #9 326

#11 ((toxic* or toxicologic* or "drug toxicity") near (MTX or methotrexat*)):ti,ab 198

#12 ((intoleran* or intoxication or "adverse event*") near (MTX or methotrexat*)):ti,ab 69

#13 MeSH descriptor: [Drug-Related Side Effects and Adverse Reactions] this term only 783

#14 (Nonadheren* or non-adheren* or "noncompliance" or "non-compliance" or "adherence" or "compliance" or "Drug discontinuation"):ab,ti 21555

#15 MeSH descriptor: [Medication Adherence] this term only 1105

#16 MeSH descriptor: [Patient Compliance] explode all trees 8986

#17 MeSH descriptor: [Patient Dropouts] explode all trees 1580

#18 MeSH descriptor: [Treatment Refusal] explode all trees 261

#19 (contraindicat* or counterindication* or "contra indication*"):ab,ti 2361

#20 #11 or #12 or #13 or #14 or #15 or #16 or #17 or #18 or #19 30671

#21 #10 and #20 39

**Revisión sistemática 5. Estrategias terapéuticas con fármacos biológicos en pacientes que no pueden utilizar Metotrexato.**

Filters:  English; French; Spanish

**Pubmed**

("Arthritis, Rheumatoid"[Mesh] OR "Caplan Syndrome"[Mesh] OR "Rheumatoid Nodule"[Mesh] OR "Felty Syndrome"[Mesh] OR "Rheumatoid Arthritis"[Title/Abstract] OR “early arthritis”[Title/Abstract] OR "inflammatory arthritis"[Title/Abstract] OR "Arthritis rheumatoid"[All Fields] OR ("arthritis"[All Fields] AND "rheumatoid"[All Fields]) OR ("rheumatoid"[All Fields] AND "arthritis"[All Fields])) AND ("methotrexate"[MeSH Terms] OR "methotrexate"[All Fields] OR "metotrexato"[All Fields] OR "MTX"[Title/Abstract]) AND (infliximab[All Fields] OR remicade[All Fields] OR etanercept[All Fields] OR enbrel[All Fields] OR adalimumab[All Fields] OR trudexa[All Fields] OR humira[All Fields] OR abatacept[All Fields] OR orencia[All Fields] OR rituximab[All Fields] OR rituxan[All Fields] OR mabthera[All Fields] OR tocilizumab[All Fields] OR actemra[All Fields] OR roactemra[All Fields] OR golimumab[All Fields] OR Simponi[All Fields] OR certolizumab[All Fields] OR cimzia[All Fields]) AND ("contraindications"[Subheading] OR contraindicat*[Title/Abstract] OR “counterindication*”[Title/Abstract] OR “contra indication*”[Title/Abstract]  OR "Medication Adherence"[MeSH Terms] OR "Patient Compliance"[Mesh] OR "Patient Dropouts"[Mesh] OR “Treatment Refusal"[Mesh] OR Nonadheren*[Title/Abstract] OR non-adheren*[Title/Abstract] OR “noncompliance”[Title/Abstract] OR “non-compliance”[Title/Abstract] OR "adherence"[Title/Abstract] OR "compliance"[Title/Abstract] OR “Drug discontinuation”[Title/Abstract] OR "toxicity"[Subheading] OR “Toxic*”[Title/Abstract] OR “toxologic*”[Title/Abstract] OR “Drug Toxicity”[Title/Abstract] OR "Drug-Related Side Effects and Adverse Reactions"[Mesh] OR “Adverse Drug Reaction Reporting Systems"[Mesh] OR intoleran*[Title/Abstract] OR “intoxication”[Title/Abstract] OR “adverse event*”[Title/Abstract]) NOT ("Clinical Conference"[Publication Type] OR "Congresses"[Publication Type] OR "Consensus Development Conference"[Publication Type] OR "Editorial"[Publication Type] OR "Published Erratum"[Publication Type] OR "Letter"[Publication Type] OR "Comment"[Publication Type]) NOT ("Animals"[Mesh] NOT ("Animals"[Mesh] AND "Humans"[Mesh])))

**Embase**

'arthritis, rheumatoid'/de OR 'caplan syndrome'/de OR 'caplan syndrome':ab,ti OR 'rheumatoid nodule'/de OR 'rheumatoid nodule':ab,ti OR 'felty syndrome'/de OR 'felty syndrome':ab,ti OR 'rheumatoid arthritis'/de OR 'rheumatoid arthritis':ab,ti OR 'early arthritis':ab,ti OR 'inflammatory arthritis'/de OR 'inflammatory arthritis':ab,ti OR 'arthritis rheumatoid'/de OR 'arthritis rheumatoid':ab,ti OR ('arthritis'/exp OR 'arthritis':ab,ti AND 'rheumatoid':ab,ti) OR ('rheumatoid':ab,ti AND ('arthritis'/exp OR 'arthritis':ab,ti)) AND 'methotrexate'/exp OR methotrexate:ab,ti OR metotrexato:ab,ti OR 'mtx'/exp OR mtx:ab,ti AND ('infliximab'/exp OR infliximab:ab,ti OR 'remicade'/exp OR remicade:ab,ti OR 'etanercept'/exp OR etanercept:ab,ti OR 'enbrel'/exp OR enbrel:ab,ti OR 'adalimumab'/exp OR adalimumab:ab,ti OR trudexa*:ab,ti OR 'humira'/exp OR humira:ab,ti OR 'abatacept'/exp OR abatacept:ab,ti OR 'orencia'/exp OR orencia:ab,ti OR 'rituximab'/de OR 'rituximab':ab,ti OR 'tocilizumab'/exp OR tocilizumab:ab,ti OR 'actemra'/exp OR 'roactemra'/exp OR roactemra:ab,ti OR actemra:ab,ti OR 'golimumab'/exp OR golimumab:ab,ti OR 'simponi'/exp OR simponi:ab,ti OR certolizumab:ab,ti OR 'cimzia'/exp OR cimzia:ab,ti) AND ('drug contraindication'/exp OR 'drug contraindication':ab,ti OR contraindicat*:ab,ti OR counterindication*:ab,ti OR “contra indication”:ab,ti  OR 'medication compliance'/de OR 'medication adherence':ab,ti OR 'patient compliance'/exp OR 'patient compliance':ab,ti OR 'patient dropouts'/exp OR 'patient dropouts':ab,ti OR 'treatment refusal'/de OR 'treatment refusal':ab,ti OR nonadheren*:ab,ti OR 'non adherence':ab,ti OR noncompliance:ab,ti OR 'non compliance':ab,ti OR adherence:ab,ti OR compliance:ab,ti OR 'drug discontinuation':ab,ti OR 'toxicity'/de OR toxic*:ab,ti OR 'drug toxicity'/de OR 'drug toxicity and intoxication'/de OR 'drug toxicity':ab,ti OR 'adverse drug reaction'/de OR 'adverse drug reaction':ab,ti OR intoleran*:ab,ti OR 'intoxication'/de OR 'adverse event':ab,ti ) AND ( [embase]/lim NOT [medline]/lim AND ([english]/lim OR [french]/lim OR [spanish]/lim) NOT ('animals'/exp NOT ('animals'/exp AND 'humans'/exp)) NOT ([conference abstract]/lim OR [conference paper]/lim OR [conference review]/lim OR [erratum]/lim OR [letter]/lim OR [note]/lim OR [short survey]/lim)

**Cochrane**

ID Search Hits

#1 MeSH descriptor: [Arthritis, Rheumatoid] this term only 4051

#2 "rheumatoid arthritis":ti,ab 6606

#3 "arthritis rheumatoid":ti,ab 17

#4 #1 or #2 or #3 7111

#5 MeSH descriptor: [Methotrexate] explode all trees 2859

#6 (methotrexat* or mtx):ab,ti 4974

#7 #5 or #6 5593

#8 #4 and #7 1613

#9 (infliximab or remicade or etanercept or enbrel or adalimumab or trudexa or humira or abatacept or orencia or rituximab or rituxan ORmabthera or tocilizumab or actemra or roactemra or golimumab or simponi or certolizumab or cimzia):ti,ab 3872

#10 #8 and #9 728

#11 ((toxic* or toxicologic* or "drug toxicity") near (MTX or methotrexat*)):ti,ab 198

#12 ((intoleran* or intoxication or "adverse event*") near (MTX or methotrexat*)):ti,ab 69

#13 MeSH descriptor: [Drug-Related Side Effects and Adverse Reactions] this term only 783

#14 (Nonadheren* or non-adheren* or "noncompliance" or "non-compliance" or "adherence" or "compliance" or "Drug discontinuation"):ab,ti 21555

#15 MeSH descriptor: [Medication Adherence] this term only 1105

#16 MeSH descriptor: [Patient Compliance] explode all trees 8986

#17 MeSH descriptor: [Patient Dropouts] explode all trees 1580

#18 MeSH descriptor: [Treatment Refusal] explode all trees 261

#19 (contraindicat* or counterindication* or "contra indication*"):ab,ti 2361

#20 #11 or #12 or #13 or #14 or #15 or #16 or #17 or #18 or #19 30671

#21 #10 and #20 48

**PROCESO DE SELECCIÓN ARTICULOS DE LAS REVISIONES SISTEMÁTICAS**

**Revisión sistemática 1. Contraindicación para la utilización de Metotrexato**

Medline (n = 69)

EMBASE (n = 113)

Cochrane (n = 11)

9 duplicados

193 artículos

184 artículos

Excluidos tras la lectura de título (n = 137)

47 artículos

42 artículos

Excluidos tras la lectura de resumen (n = 5)

(n=21)

**Incluidos**

14 artículos

Excluidos tras lectura a texto completo (n = 32)

Búsqueda

Manual (4)

secundaria (n = 2)

Ilustración 1. Flujograma para la identificación y proceso de selección de artículos.

**Revisión sistemática 2. Toxicidad al Metotrexato**

Medline (n=458)

EMBASE (n=312)

Cochrane (n=120)

99 duplicados

890 artículos

791 artículos

Excluidos tras la lectura de título (n=517)

274 artículos

20 artículos

Excluidos tras la lectura de abstract (n=254)

(n=21)

**Incluidos**

8 artículos

Excluidos tras lectura a texto completo (n =12)

Ilustración 2. Flujograma para la identificación y proceso de selección de artículos.

**Revisión sistemática 3. Falta de adherencia al Metotrexato.**

Medline (n=135)

EMBASE (n=92)

Cochrane (n=31)

28 duplicados

258 artículos

230 artículos

Excluidos tras la lectura de título (n=102)

128 artículos

10 artículos

Excluidos tras la lectura de abstract (n= 118)

(n=21)

**Incluidos**

10 artículos

Excluidos tras lectura a texto completo (n = 3)

3 Búsqueda manual

Ilustración 3. Flujograma para la identificación y proceso de selección de artículos.

**Revisión sistemática 4. Estrategias terapéuticas con fármacos modificadores de la enfermedad clásicos en pacientes que no pueden utilizar Metotrexato.**

Medline (n=206)

EMBASE (n=275)

Cochrane (n=39)

20 duplicados

520 artículos

500 artículos

8 artículos

Excluidos tras la lectura de abstract (n= 492)

(n=21)

**Incluidos**

1 artículo

Excluidos tras lectura a texto completo (n = 8)

1 Búsqueda manual

Ilustración 4. Flujograma para la identificación y proceso de selección de artículos.

**Revisión sistemática 5. Estrategias terapéuticas con fármacos biológicos en pacientes que no pueden utilizar Metotrexato.**

Medline (n=194)

EMBASE (n=241)

Cochrane (n=48)

Duplicados =38

n=483

n=445

Excluidos tras la lectura de título (n=249)

n=196

n=35

Excluidos tras la lectura de abstract (n=161)

(n=21)

**Incluidos**

n=23

Excluidos tras lectura a texto completo (n=12)

Ilustración 5. Flujograma para la identificación y proceso de selección de artículos.

**Sistema de clasificación la evidencia científica y grado de recomendación propuesto por The Scottish Intercollegiate Guidelines Network (SIGN).**

| **Niveles de evidencia científica** | |
| --- | --- |
| 1++ | Metaanálisis de alta calidad, revisiones sistemáticas de ensayos clínicos o ensayos clínicos de alta calidad con muy poco riesgo de sesgo. |
| 1+ | Metaanálisis bien realizados, revisiones sistemáticas de ensayos clínicos o ensayos clínicos bien realizados con poco riesgo de sesgos. |
| 1- | Metaanálisis, revisiones sistemáticas de ensayos clínicos o ensayos clínicos con alto riesgo de sesgos. |
| 2++ | Revisiones sistemáticas de alta calidad de estudios de cohortes o de casos y controles. Estudios de cohortes o de casos y controles con riesgo muy bajo de sesgo y con alta probabilidad de establecer una relación causal. |
| 2+ | Estudios de cohortes o de casos y controles bien realizados con bajo riesgo de sesgo y con una moderada probabilidad de establecer una relación causal. |
| 2- | Estudios de cohortes o de casos y controles con alto riesgo de sesgo y riesgo significativo de que la relación no sea causal. |
| 3 | Estudios no analíticos, como informes de casos y series de casos. |
| 4 | Opinión de expertos. |
| **Grados de recomendación** | |
| A | Al menos un metaanálisis, revisión sistemática o ensayo clínico clasificado como 1++ y directamente aplicable a la población diana de la guía; o un volumen de evidencia científica compuesto por estudios clasificados como 1+ y con gran consistencia entre ellos. |
| B | Un volumen de evidencia científica compuesta por estudios clasificados como 2 ++, directamente aplicable a la población diana de la guía y que demuestran gran consistencia entre ellos; o evidencia científica extrapolada desde estudios clasificados como 1 ++ ó 1+ |
| C | Un volumen de evidencia científica compuesta por estudios clasificados como 2 + directamente aplicables a la población diana de la guía y que demuestran gran consistencia entre ellos; o evidencia científica extrapolada desde estudios clasificados como 2 ++ |
| D | Evidencia científica de nivel 3 ó 4; o evidencia científica extrapolada desde estudios clasificados como 2+ |
| Los estudios clasificados como 1- y 2- no deben usarse en el proceso de elaboración de recomendaciones por su alto potencial de sesgo | |
| Buena práctica clínica | |
| 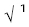 | Práctica recomendada, basada en la experiencia clínica y el consenso del equipo redactor. |
| *1. En ocasiones el grupo elaborador se percata de que existe algún aspecto práctico importante sobre el que se quiere hacer énfasis y para el cual no existe, probablemente, ninguna evidencia científica que lo soporte. En general estos casos están relacionados con algún aspecto del tratamiento considerado buena práctica clínica y que nadie cuestionaría habitualmente. Estos aspectos son valorados como puntos de buena práctica clínica. Estos mensajes no son una alternativa a las recomendaciones basadas en la evidencia científica sino que deben considerarse únicamente cuando no existe otra manera de destacar dicho aspecto.* | |
